# Supplementary material
Source: publisher figshare collection journal article supplement (https://gsajournals.figshare.com/ndownloader/files/12776384)
Supplement: Supplementary file 1 [file 12776384]

Table S5. List of genes in the overlapping significant region with annotations.,,,,,,,,,,,,,,
locusName,transcriptName,chromosome,start(bp),end(bp),strand,Pfam,Panther,KOG,ec,KO,GO,Best-hit-arabi-name,arabi-symbol,arabi-defline
Vigun05g036900,Vigun05g036900.1,Vu05,2995359,2995865,-,,,,,,,,,
Vigun05g037000,Vigun05g037000.1,Vu05,2996863,2999748,-,PF07839,"PTHR33349,PTHR33349:SF1",,,,GO:0005516,AT5G39380.1,,Plant calmodulin-binding protein-related
Vigun05g037100,Vigun05g037100.1,Vu05,3002915,3004872,-,PF13445,"PTHR13139,PTHR13139:SF47",,2.7.11.1,,,AT3G29270.1,,RING/U-box superfamily protein
Vigun05g037200,Vigun05g037200.1,Vu05,3017767,3023690,+,PF00520,"PTHR10217,PTHR10217:SF501",,,K05391,"GO:0055085,GO:0016020,GO:0006811,GO:0005216",AT5G15410.1,"ATCNGC2,CNGC2,DND1",Cyclic nucleotide-regulated ion channel family protein
Vigun05g037300,Vigun05g037300.1,Vu05,3024000,3029597,+,"PF13350,PF10409",PTHR12305,KOG2283,"3.1.3.67,3.1.3.16,3.1.3.48",K01110,,AT5G39400.1,"ATPTEN1,PTEN1",Calcium/lipid-binding (CaLB) phosphatase
Vigun05g037400,Vigun05g037400.1,Vu05,3028693,3033040,-,PF00588,"PTHR12029,PTHR12029:SF45",KOG0838,2.1.1.34,,"GO:0008173,GO:0006396,GO:0003723",AT5G15390.1,,tRNA/rRNA methyltransferase (SpoU) family protein
Vigun05g037500,Vigun05g037500.1,Vu05,3032291,3034576,+,"PF08100,PF00891","PTHR11746,PTHR11746:SF112",KOG3178,"2.1.1.154,2.1.1.65",K13066,"GO:0046983,GO:0008171",AT5G54160.1,"ATOMT1,OMT1",O-methyltransferase 1
Vigun05g037600,Vigun05g037600.1,Vu05,3034236,3037287,-,PF03435,"PTHR12286,PTHR12286:SF5",KOG2733,,,"GO:0055114,GO:0016491",AT5G39410.1,,Saccharopine dehydrogenase 
Vigun05g037700,Vigun05g037700.1,Vu05,3037504,3038602,-,PF02622,"PTHR31984,PTHR31984:SF3",,,K07735,,AT3G29240.2,,Protein of unknown function (DUF179)
Vigun05g037800,Vigun05g037800.1,Vu05,3040544,3041840,+,,"PTHR34454,PTHR34454:SF1",,,,,AT1G47310.1,,
Vigun05g037900,Vigun05g037900.1,Vu05,3042183,3043997,-,"PF01535,PF13041","PTHR24015,PTHR24015:SF912",,,,,AT3G29230.1,,Tetratricopeptide repeat (TPR)-like superfamily protein
Vigun05g038000,Vigun05g038000.1,Vu05,3060435,3065279,+,PF03106,"PTHR31221,PTHR31221:SF24",,,,"GO:0043565,GO:0006355,GO:0003700",AT2G03340.1,WRKY3,WRKY DNA-binding protein 3
Vigun05g038100,Vigun05g038100.1,Vu05,3067505,3074091,+,PF00069,"PTHR24056,PTHR24056:SF188",,"2.7.11.22,2.7.11.23",,"GO:0006468,GO:0005524,GO:0004672",AT1G18670.1,IBS1,Protein kinase superfamily protein
Vigun05g038200,Vigun05g038200.1,Vu05,3075879,3080634,-,PF07059,"PTHR31558,PTHR31558:SF1",,,,,AT3G29180.2,,Protein of unknown function (DUF1336)
Vigun05g038300,Vigun05g038300.1,Vu05,3082490,3085634,+,PF07714,"PTHR24343,PTHR24343:SF183",KOG0583,2.7.11.1,K07198,"GO:0006468,GO:0004672",AT3G01090.2,"AKIN10,KIN10,SNRK1.1",SNF1 kinase homolog 10
Vigun05g038400,Vigun05g038400.1,Vu05,3089277,3093974,+,"PF00627,PF14531,PF02149","PTHR24343,PTHR24343:SF156",KOG0583,2.7.11.1,K07198,,AT3G01090.2,"AKIN10,KIN10,SNRK1.1",SNF1 kinase homolog 10
Vigun05g038500,Vigun05g038500.1,Vu05,3094832,3095992,-,PF00847,"PTHR31194,PTHR31194:SF14",,,K09286,"GO:0006355,GO:0003700",AT5G19790.1,RAP2.11,related to AP2 11
Vigun05g038600,Vigun05g038600.1,Vu05,3098241,3104650,-,"PF14703,PF13967,PF02714","PTHR13018,PTHR13018:SF32",,,,GO:0016020,AT3G01100.1,"ATHYP1,HYP1",hypothetical protein 1
Vigun05g038700,Vigun05g038700.1,Vu05,3105958,3109014,+,"PF05008,PF12352","PTHR21230,PTHR21230:SF33",KOG1666,,K08493,"GO:0016020,GO:0006886",AT5G39510.1,"ATVTI11,ATVTI1A,SGR4,VTI11,VTI1A,ZIG,ZIG1",Vesicle transport v-SNARE family protein
Vigun05g038800,Vigun05g038800.1,Vu05,3109139,3112792,-,PF01095,"PTHR31321,PTHR31321:SF12",,3.1.1.11,K01051,"GO:0042545,GO:0030599,GO:0005618",AT3G29090.1,"ATPME31,PME31",pectin methylesterase 31
Vigun05g038900,Vigun05g038900.1,Vu05,3114174,3120092,+,"PF01535,PF13041","PTHR24015,PTHR24015:SF866",,,,,AT2G26790.1,,Pentatricopeptide repeat (PPR) superfamily protein
Vigun05g039000,Vigun05g039000.1,Vu05,3120875,3121492,-,,"PTHR31251,PTHR31251:SF21",,,,,AT2G47070.1,SPL1,squamosa promoter binding protein-like 1
Vigun05g039100,Vigun05g039100.1,Vu05,3123267,3124733,-,"PF13812,PF01535,PF13041","PTHR24015,PTHR24015:SF422",,,,,AT1G74630.1,,Tetratricopeptide repeat (TPR)-like superfamily protein
Vigun05g039200,Vigun05g039200.1,Vu05,3125493,3127043,-,PF01105,"PTHR22811,PTHR22811:SF72",KOG1691,,,"GO:0016021,GO:0006810",AT1G26690.1,,emp24/gp25L/p24 family/GOLD family protein
Vigun05g039300,Vigun05g039300.1,Vu05,3141860,3143467,+,PF00249,"PTHR10641,PTHR10641:SF526",,,,,AT1G66370.1,"AtMYB113,MYB113",myb domain protein 113
Vigun05g039400,Vigun05g039400.1,Vu05,3153469,3157097,+,PF00249,"PTHR10641,PTHR10641:SF526",KOG0048,,,,AT1G66370.1,"AtMYB113,MYB113",myb domain protein 113
Vigun05g039500,Vigun05g039500.1,Vu05,3160190,3161739,+,PF00249,"PTHR10641,PTHR10641:SF526",KOG0048,,"K16166,K09422",,AT1G66370.1,"AtMYB113,MYB113",myb domain protein 113
Vigun05g039600,Vigun05g039600.1,Vu05,3164727,3169624,+,"PF03105,PF03124","PTHR10783,PTHR10783:SF43",,,,GO:0016021,AT3G29060.1,,EXS (ERD1/XPR1/SYG1) family protein
Vigun05g039700,Vigun05g039700.1,Vu05,3183282,3184259,+,PF00249,"PTHR10641,PTHR10641:SF526",,,,,AT1G66370.1,"AtMYB113,MYB113",myb domain protein 113
Vigun05g039800,Vigun05g039800.1,Vu05,3206679,3207924,+,PF00249,"PTHR10641,PTHR10641:SF526",,,,,AT1G66370.1,"AtMYB113,MYB113",myb domain protein 113
Vigun05g039900,Vigun05g039900.1,Vu05,3222044,3227003,-,PF01053,"PTHR11808,PTHR11808:SF14",KOG0053,2.5.1.48,K01739,GO:0030170,AT3G01120.1,"ATCYS1,CGS,CGS1,MTO1",Pyridoxal phosphate (PLP)-dependent transferases superfamily protein
Vigun05g040000,Vigun05g040000.1,Vu05,3233301,3235391,+,,,,,,,,,
Vigun05g040100,Vigun05g040100.1,Vu05,3235856,3239032,-,PF00249,"PTHR10641,PTHR10641:SF546",KOG0048,,K09422,,AT5G15310.1,"ATMIXTA,ATMYB16,MYB16",myb domain protein 16
Vigun05g040200,Vigun05g040200.1,Vu05,3257267,3259847,+,"PF12854,PF01535,PF13041","PTHR24015,PTHR24015:SF820",,,,,AT5G15300.1,,Pentatricopeptide repeat (PPR) superfamily protein
Vigun05g040300,Vigun05g040300.1,Vu05,3263188,3269148,-,PF00013,"PTHR10288,PTHR10288:SF151",KOG2190,,K13162,GO:0003723,AT5G15270.2,,RNA-binding KH domain-containing protein
